1  
2  
3  
4  
5  
6  
7

## **AtOM, an ontology model for standardizing use of brain atlases in tools, workflows, and data infrastructures**

### **8 Authors**

9 Heidi Kleven\*<sup>1</sup>, Thomas H. Gillespie\*<sup>2</sup>, Lyuba Zehl<sup>3</sup>, Timo Dickscheid<sup>3, 4</sup>, Jan G. Bjaalie<sup>1</sup>,  
10 Maryann E. Martone<sup>2</sup>, Trygve B. Leergaard<sup>1</sup>

11

### **12 Affiliations**

- 13 1. Department of Molecular Medicine, Institute of Basic Medical Sciences, University of  
14 Oslo, Norway  
15 2. Department of Neurosciences, University of California, San Diego, USA  
16 3. Institute of Neuroscience and Medicine (INM-1), Research Centre Jülich, Germany  
17 4. Institute of Computer Science, Heinrich Heine University Düsseldorf, Germany

18  
19

20 \* Shared first authorship

21 Correspondence to: Trygve B. Leergaard (t.b.leergaard@medisin.uio.no)

## 22 **Abstract**

23 Brain atlases are important reference resources for accurate anatomical description of  
24 neuroscience data. Open access, three-dimensional atlases serve as spatial frameworks for  
25 integrating experimental data and defining regions-of-interest in analytic workflows.  
26 However, naming conventions, parcellation criteria, area definitions, and underlying mapping  
27 methodologies differ considerably between atlases and across atlas versions. This lack of  
28 standardization impedes use of atlases in analytic tools and registration of data to different  
29 atlases. To establish a machine-readable standard for representing brain atlases, we identified  
30 four fundamental atlas elements, defined their relations, and created an ontology model. Here  
31 we present our Atlas Ontology Model (AtOM) and exemplify its use by applying it to mouse,  
32 rat, and human brain atlases. We propose minimum requirements for FAIR atlases and  
33 discuss how AtOM may facilitate atlas interoperability and data integration. AtOM provides  
34 a standardized framework for communication and use of brain atlases to create, use, and refer  
35 to specific atlas elements and versions. We argue that AtOM will accelerate analysis, sharing,  
36 and reuse of neuroscience data.

## 37 **Introduction**

38 Brain atlases are essential anatomical reference resources that are widely used for planning  
39 experimental work, interpreting and analyzing neuroscience data<sup>1-12</sup>. Three-dimensional (3D)  
40 digital brain atlases<sup>11,13-17</sup> are increasingly employed as frameworks for integrating,  
41 comparing, and analyzing data based on atlas-defined anatomical locations (e.g. Allen brain  
42 map, <https://portal.brain-map.org/>; the BRAIN Initiative Cell Census Network,  
43 <https://www.biccn.org/>; the EBRAINS research infrastructure, <https://ebrains.eu/>). These  
44 resources provide anatomical context suitable for brain-wide or region specific analysis using  
45 automated tools and workflows<sup>18-26</sup> and facilitate sharing and using data in accordance with  
46 the FAIR principles<sup>27</sup>, stating that data should be findable, accessible, interoperable, and  
47 reusable. However, the use and incorporation of different atlas resources in such workflows  
48 and infrastructures requires that atlases, tools, and data are interoperable, with relatively  
49 seamless exchange of standardized machine-readable information.

50 Most brain atlases share a set of common properties, but the specifications and  
51 documentation of their parts differ considerably. Detailed versioning is not yet common  
52 practice for all atlases, and lack of specific information about changes in the terminology or  
53 anatomical parcellation make it difficult to compare atlas versions. While some gold  
54 standards have been established<sup>28</sup>, lack of consensus regarding the presentation, specification,  
55 and documentation of atlas contents hampers reproducible communication of locations<sup>9</sup> and  
56 comparison of data that have been anatomically specified using different atlases<sup>8,24</sup>. Atlases  
57 and their versions need to be uniquely identifiable and interoperable to enable researchers to  
58 communicate specific and reproducible location data and integrate data across specialized  
59 neuroscience fields and modalities.

60 To address the lack of standardization of atlas metadata, we identified four common  
61 atlas elements, defined their relations, and created the Atlas Ontology Model (AtOM). Here  
62 we characterize the properties and relations of the elements and explain their organization in  
63 AtOM. We argue that a given set of these elements, their relations, and metadata makes up a  
64 unique version of an atlas. Furthermore, we suggest a set of minimum requirements for  
65 atlases inspired by the FAIR principles, and discuss how atlases adhering to AtOM, could  
66 accelerate neuroscience data integration.

## 67 **Results**

68 We investigated a broad selection of mammalian brain atlases<sup>11,13,14,16,29–37</sup> and identified four  
69 common elements: 1) a set of reference data, 2) a coordinate system, 3) a set of annotations  
70 and 4) a terminology. Below, we describe these atlas elements and their relations, exemplify  
71 how these elements specify unique versions of an atlas, and employ AtOM to suggest  
72 minimum requirements for FAIR brain atlases. The ontology model description is publicly  
73 available via GitHub: <https://github.com/SciCrunch/NIF-Ontology/blob/atlas/ttl/atom.ttl>.

74

### 75 **The atlas elements**

76 The atlas elements in AtOM are the reference data, coordinate system, annotation set, and  
77 terminology (Fig. 1a-c). Each of the four elements have properties, such as identifier, species,  
78 sex, and age, specified with detailed metadata (Fig. 1d).

79       The *reference data* of a brain atlas are graphical representations of one or several  
80 brains, or parts of brains, chosen as the biological reference for that atlas. The reference data  
81 often consist of histological or tomographic images. These images reflect different biological  
82 features of a selected specimen<sup>14,17,32,33</sup>, a set of different subjects representing different  
83 features and image orientations<sup>38</sup>, or a population average<sup>11,13,16</sup>. The level of detail and size  
84 of brain regions that can be identified is determined by the spatial resolution of the reference  
85 data. For example, the widely adopted human reference datasets of the Montreal Neurological  
86 Institute (MNI)<sup>39,40</sup> are based on averaged magnetic resonance imaging (MRI) scans and  
87 represent suitable reference data for macroanatomy, while the single-subject *BigBrain*  
88 model<sup>31</sup> provides a reference dataset for identification of cortical layers and more fine-  
89 grained cortical and subcortical structures<sup>17</sup>.

90       The *coordinate system* of an atlas provides a framework for specifying locations with  
91 units, origin, direction, and orientation. The coordinate system is usually, but not always, a  
92 3D Cartesian coordinate system. Examples of coordinate systems which go beyond a 3D  
93 Cartesian system are spatio-temporal systems, with additional time and surface dimensions<sup>41</sup>.  
94 In neuroscience, many coordinate systems are defined using characteristic features of the  
95 skull<sup>32,33</sup> or specific anatomical landmarks identified within the brain<sup>14,42</sup>.

96       The *annotation set* of an atlas consist of graphical marks or labels referring to spatial  
97 locations determined by features observed in, inferred from, or mapped onto the reference  
98 data, specifying structures or boundaries. An annotation set may demarcate anatomical  
99 boundaries or regions with lines, fully delineate them with closed curves<sup>11,14,32,33</sup>, or directly

100 label coordinates with brain structures in the form of volumetric or surface maps. In the case  
101 of probabilistic maps, coordinates are labelled with the probabilities of a certain region or  
102 feature being present at a given location<sup>16,43–45</sup>. Probabilistic maps are typically aggregated  
103 from annotations identified in different individuals, encoding variation across a number of  
104 subjects<sup>16</sup>.

105         The *terminology* of an atlas is a set of terms that identifies the annotations, providing  
106 human readability and context, and allowing communication about brain locations and  
107 structural properties. In its simplest form, a terminology can be a list of unique identifiers, but  
108 is typically a set of descriptive anatomical terms following specific conventions. Atlases  
109 employ different terms, conventions, and approaches to organizing brain structures into  
110 systems based on the methodology used to create them as well as their intended use cases.  
111 For example, some use developmental organization<sup>46,47</sup>, while others use brain systems<sup>37</sup>,  
112 microstructural organization<sup>17</sup>, multimodal features<sup>48</sup>, or are specialized for particular brain  
113 regions<sup>49,50</sup>. An atlas terminology may be a controlled vocabulary (flat list), a taxonomy and  
114 partonomy (hierarchical list), or an ontology (hierarchy and additional axioms).

115

## 116 **Relations among the elements**

117 The four elements of AtOM have specific relations (specified in Fig. 1f), sorted into a *spatial*  
118 *module*, consisting of the reference data and the coordinate system (Fig. 1b, yellow), and a  
119 *semantic module*, consisting of the annotation set and the terminology (Fig. 1b, blue).

120         The elements of the *spatial module* provide the physical and measurable dimensions  
121 of the atlas. The biological dimensions of the reference data give the conditions of operation  
122 for (i.e., *parameterize*) the coordinate system. The coordinate system provides a metric for  
123 (i.e., *measures*) the reference data, specifying the origin, orientation, and units (Fig. 1f).  
124 Coordinates are the means to derive measurements, indicate directions and spatially locate  
125 features in the reference data. The coordinate system also *measures* the annotation set, and  
126 thus connects the annotations to the features of the reference data.

127         The elements of the *semantic module* provide semantic identities for the atlas. The  
128 annotation set *parameterizes* the terminology in the spatial domain according to or inspired  
129 by the reference data. The terminology provides terms to establish the identity of (i.e.,  
130 *identifies*) each annotation (Fig. 1f). While anatomical terms are not unique identifiers (see  
131 Atlas versioning below), they provide a means to semantically address annotations and  
132 conveying neuroanatomical knowledge and context (Fig. 1f). In this way, the terms are

133 semantic units suitable for navigating the atlas annotations, while annotations capture the  
134 scholarly interpretations and knowledge underlying the experimental and anatomical criteria  
135 used to make them (parcellation criteria). Further, the annotation set propagates the semantic  
136 identities from the terminology, and thus semantically *identifies* locations in the coordinate  
137 system.

138         The relations of the atlas elements are pathways for translating information between  
139 the spatial and semantic modules. A researcher may consult an atlas to observe the physical  
140 shape and location associated with a given anatomical term, or to identify the anatomical  
141 term assigned to specific coordinates, or biological features observed in the reference data.  
142 Thus, the model is a continuous, bidirectional loop providing several starting points for  
143 researchers to translate and compare information across atlas elements.

144

### 145 **Atlas versioning**

146 With an overview of the elements and relations of AtOM in hand, we are now in position to  
147 examine how they facilitate clear versioning of an atlas. In AtOM, an atlas version is a  
148 concrete instance of an atlas, and consists of specific elements, relations, and metadata (Fig.  
149 1). Figure 2 and Table 1 shows the most recent versions of the EBRAINS supported mouse<sup>11</sup>,  
150 rat<sup>14</sup>, and human<sup>16</sup> brain atlases modeled using AtOM. An important consequence of AtOM is  
151 that the atlas version changes if there are alterations to any element. Examples of alterations  
152 include revising annotations or terms, modifying the reference data or coordinate system, or  
153 replacing an element. Such changes have consequences for the specific properties and use of  
154 an atlas, and should be specified as a new atlas version. The changes made from one version  
155 to another can be described in atlas version documentation, and new versions of an atlas are  
156 usually distinguished by a new version name. The simplest way to do this is by iterative  
157 version numbering. Table 2 shows a complete overview of all versions of the Allen Mouse  
158 Brain Atlas Common Coordinate Framework (AMBA CCF)<sup>11,13</sup>, the Waxholm Space atlas of  
159 the Sprague Dawley rat brain (WHS rat brain atlas)<sup>14,36,37</sup>, and selected alternative versions of  
160 the Julich-Brain Cytoarchitectonic Atlas (Julich-Brain Atlas)<sup>16</sup>. In the last versions of the  
161 AMBA CCF (v3 2015-2017)<sup>11,13,30,51-53</sup> and the WHS rat brain atlas (v1.01-v4)<sup>14,29,36,37</sup> the  
162 semantic elements (annotation set and terminology) have been changed across versions, while  
163 the spatial elements (reference data and coordinate system, Table 2) have been kept constant.  
164 This continuation across versions allows translation of information and experimental data

165 registered to the reference data are compatible with all versions of the mouse and rat atlas  
166 versions.

167 To clearly reference a specific atlas version or AtOM element, it needs a unique  
168 identifier (ID). This is particularly important when combining different versions of elements  
169 into alternative atlas versions. The major release v2.9 of the Julich-Brain Atlas (Table 2) has  
170 four alternative versions due to its use of four complementary spatial modules: the “MNI  
171 Colin 27” (individual specimen, 1 mm resolution), “MNI 152” (population average, 1mm  
172 resolution), “BigBrain” (individual specimen, 20  $\mu$ m resolution) and “fsaverage” (cortical  
173 surface representation)<sup>17,31,54–56</sup>. These alternative versions are identified by combining the  
174 major release identifier (v2.9) with the abbreviated name of the respective reference data and  
175 coordinate systems. Unique identifiers are also important to differentiate between identical  
176 terms, which are often similar, but not identical, anatomical areas within and across species  
177 and atlases. Ambiguity can be avoided by indexing atlas version specific terms and providing  
178 unique ontology IDs defining their properties and relations. Following AtOM, an atlas  
179 version should have unique IDs for each element and their instances, which together with  
180 version documentation facilitate clear referencing of atlas versions and specific atlas elements  
181 (Fig. 1e).

182

### 183 **Minimum requirements for FAIR brain atlases**

184 Atlases are a type of research data and thus can be evaluated using the foundational principles  
185 of the FAIR guidelines<sup>27</sup>. These principles state that data should be findable, accessible,  
186 interoperable, and reusable through both human and machine-driven activities. Similar to  
187 experimental data, atlases can support these principles through use of unique identifiers,  
188 specific metadata, open protocols, and clear usage licenses. Furthermore, interoperability and  
189 reuse of data also requires use of “formal, accessible, shared, and broadly applicable language  
190 for knowledge representation”, as well as metadata providing detailed descriptions. Based on  
191 our proposed ontology model, we suggest the following set of four minimum requirements  
192 for FAIR brain atlases: 1) machine readable digital components, 2) defined spatial and  
193 semantic modules with element metadata, 3) specification of element versions with detailed  
194 documentation, and 4) defined element relations and metadata (Fig. 1d-e). We elaborate on  
195 these requirements below.

196 First, *machine-readable digital atlas components* imply that all files and metadata are  
197 available in open and non-proprietary file formats suitable for direct processing by a machine.

198 The files and metadata for all the atlas versions shown in Figure 2 are available online, either  
199 on public websites, domain repositories, or at the atlases' respective homepages. Table 1  
200 shows brain atlas version metadata for the four brain atlas versions shown in Figure 2.

201       Second, *defined spatial and semantic modules* in an atlas mean that all elements are  
202 identifiable and accessible with clear metadata. This makes atlases easier for users to  
203 understand and easier to incorporate into tools and infrastructure. At a minimum, this can be  
204 clear naming of the essential files or documentation about the location of all necessary  
205 information (Table 1). For example, all the files needed for using the WHS rat brain atlas are  
206 available via a domain repository (Table 2).

207       Third, *clear versioning with granular documentation* that state all changes  
208 differentiating two version of an atlas are needed to adhere to open science and FAIR  
209 principles. Currently this is achieved through use of persistent identifiers for publications,  
210 International Standard Book Numbers (ISBN) for atlases published as books, and Digital  
211 Object Identifiers (DOI) or Research Resource Identifiers (RRID)<sup>57</sup> for digital atlases. In  
212 addition, atlas reference data are made available as associated files<sup>38</sup>, as downloadable  
213 internet resources<sup>11,16,17,37</sup>, or by providing selected methodological descriptions in  
214 publications<sup>14,16</sup>. Some atlases also provide documentation as a list, or as text describing new  
215 features or a high-level inventory of changes. Ideally, clear versioning of an atlas should  
216 enable novice users to identify the differences between two versions (Table 2).

217       Fourth, the *explicit relations between atlas elements*, such as parcellation criteria and  
218 coordinate system definitions, provide an empirical foundation for translating information  
219 across the elements. This allows users to connect data to different atlas elements (semantic or  
220 spatial), and automated search or comparison of data using terms and coordinates.  
221 Traditionally, such methodological information is presented in publications<sup>14,16</sup>, but can also  
222 be available as white papers via a webpage<sup>53,58,59</sup> or as single or distributed data  
223 publications<sup>55</sup> (Table 2).

224       Brain atlases that fulfill these four requirements are thus expected to be sufficiently  
225 well defined to be incorporated into research infrastructures and enable automated transfer of  
226 information across atlases and between data registered to other FAIR atlases.

227



## 228 **Discussion**

229 We have identified spatial and semantic elements of brain atlases, defined their relations, and  
230 created an Atlas Ontology Model (AtOM), specifying human and machine-readable  
231 metadata. Even though the AtOM elements are readily recognized in different atlases, they  
232 are often named according to traditions or common practice. For example, the reference data  
233 and the coordinate system are often considered as one entity, and referred to as the common  
234 coordinate space, reference template, reference space, brain model or atlas<sup>7,40</sup>. The term atlas  
235 is invariably used to address reference data, an atlas version, any of a series of atlas versions  
236 or the annotation set. The annotation set, often in combination with the terminology, has also  
237 been called parcellations, segmentations or delineations<sup>16,17,37,43</sup>.

238 Some of the AtOM elements have been suggested earlier<sup>7</sup>, as well as similar  
239 approaches to versioning and atlas organization<sup>16</sup>. However, AtOM is the first model for  
240 standardizing the common elements of any brain reference atlas, their definitions, and  
241 metadata, creating a standard to organize and share information about atlases or as a template  
242 to create an atlas.

243 When implemented, AtOM will facilitate precise and unique referencing of parts of  
244 an atlas, as well as the incorporation of atlases in digital tools or workflows. AtOM further  
245 provides a basis for specifying minimum requirements for brain atlases to comply with the  
246 FAIR principles. Below, we discuss how AtOM may contribute to increase interoperability  
247 among atlases, enable more standardized use of brain atlases in computational tools, and  
248 advance FAIR data sharing in neuroscience.

249 Interoperable atlases allow for exchange and translation of information across atlases,  
250 tools and data. Experimental data generated by different researchers typically relate to an  
251 atlas via spatial coordinates or anatomical terms, often defined by visual comparison of  
252 images or use of other observations such as measurements of functional properties.  
253 Researchers translate between the semantic and spatial location information using human  
254 readable metadata. At the same time, automated translation can be enabled via standardized,  
255 machine-readable files specifying properties and relations among atlas elements. The  
256 translation of information is dependent on interoperability across atlas elements, which can  
257 be specified at three levels: practical, technical, and scholarly.

258 At the *practical level*, translation of information across atlas elements is essential for  
259 interpretation and communication of anatomical locations, such as relating machine-readable  
260 coordinates to human-readable brain structure names. The relations specified between atlas

261 elements and the defining metadata allow comparisons of annotations and terminologies  
262 across atlases representing different species or strains, developmental stages, or disease  
263 states. By aligning reference data or coordinate systems of two different atlases, information  
264 can be directly compared or translated. However, reproducible use of atlas resources depends  
265 on unambiguous citation of atlas versions. When the atlas version reference is ambiguous, or  
266 if anatomical names are given without specification of the employed atlas version  
267 terminology, it is difficult to compare location between datasets<sup>9</sup>. Versioning, documentation,  
268 and clear references are therefore essential for atlases that change over time.

269         At a *technical level*, atlas information can be accessed using computational tools,  
270 requiring specification of essential parameters and versions, such as file formats and other  
271 technical metadata. Atlases that have closed proprietary file formats may technically be  
272 digital, but without being fully machine accessible and interoperable, they are difficult to  
273 utilize in analytic tools and infrastructures.

274         At a *scholarly level*, anatomical parcellation and terminology should be comparable  
275 across atlases. The lack of consensus about terminologies, parcellation schemata, and  
276 boundary criteria among neuroanatomists is a major challenge for the development, use, and  
277 comparison of brain atlases<sup>60-67</sup>. Following different traditions, knowledge, and criteria, both  
278 domain experts and non-expert researchers may inevitably convey subjective and sometimes  
279 irreproducible information that is difficult to document. AtOM provides a foundation for  
280 organizing and communicating specific information about brain atlases in a standardized way  
281 that allows researchers to more precisely describe their interpretations, and thus contribute to  
282 increased reproducibility of results.

283         The value of interoperable atlases is substantial, allowing data integration, analysis  
284 and communication based on anatomical location. Brain atlases incorporated in various  
285 analytical tools open the possibility for efficient approaches to analyzing, sharing, and  
286 discovering data. For example, by analyzing images mapped to an atlas, the atlas information  
287 can be used to assign coordinates and terms to objects of interest<sup>8,68</sup>. Data from different  
288 publications analyzed with the same atlas are comparable, and data registered to the spatial  
289 module (reference data and coordinate system) of an atlas may also be re-analyzed with new  
290 or alternative annotation sets. Perhaps more importantly, by specifying the AtOM elements as  
291 standardized machine readable files, it becomes possible to incorporate different atlases as  
292 exchangeable modules in analytic tools and infrastructure systems<sup>20-22,25,26</sup>. Tools and  
293 systems using interoperable atlases can exploit the defined relations among the elements for  
294 automated operations, like data queries, calculations, or assignment of location identity to

295 experimental data that have been associated with an atlas by spatial registration or semantic  
296 identification.

297         AtOM has been implemented in SANDS (spatial anchoring of neuroscience data  
298 structures, [https://github.com/HumanBrainProject/openMINDS\\_SANDS](https://github.com/HumanBrainProject/openMINDS_SANDS)), an openMINDS  
299 metadata model extension. The openMINDS metadata framework  
300 (<https://github.com/HumanBrainProject/openMINDS>,  
301 <https://wiki.ebrains.eu/bin/view/Collabs/openminds/>) is adopted by the EBRAINS  
302 infrastructure to describe neuroscience research products, such as data, models and software,  
303 as well as the EBRAINS atlas resources. The multilevel human brain atlas  
304 (<https://ebrains.eu/service/human-brain-atlas/>), an atlas framework that spans across multiple  
305 spatial scales and modalities hosted on the EBRAINS infrastructure, exemplifies how several  
306 reference data, coordinate systems, and annotation set, developed over time, can be  
307 seamlessly incorporated and presented to users through a single viewer tool. A growing  
308 repertoire of tools, services and workflows within and outside of the EBRAINS infrastructure  
309 rely on formal descriptions for automated incorporation of research products, including brain  
310 atlases and common coordinate spaces. AtOM provides a framework for keeping track of the  
311 complex relations among these resources and research products.

312         In conclusion, the primary value of AtOM is that it establishes a standardized  
313 framework for developers and researchers using brain atlases to create, use, and refer to  
314 specific atlas elements and versions. Atlas developers can use the model to create clearly  
315 citable and interoperable atlases. For developers incorporating atlases in tools, AtOM defines  
316 atlas elements as modules that can be seamlessly exchanged to accommodate atlases for other  
317 species or developmental stages, or to switch between versions, coordinate systems, or  
318 terminologies. By standardizing the communication and use of fundamental reference  
319 resources, we are convinced that AtOM will accelerate efficient analysis, sharing and reuse of  
320 neuroscience data.

## 321 **Methods**

322 Ontologies are used in information sciences to specify formal representations that define the  
323 naming, properties, and relations among data and other elements that constitute a given  
324 subject or concept<sup>69</sup>. By specifying the relations and hierarchies of objects and processes in  
325 an ontology model, it becomes possible to create systematic and coherent links among data  
326 files, metadata, and process descriptions of relevance for a complex system. Most  
327 importantly, they enable automated retrieval of information in using computational tools<sup>70</sup>.

328         The first draft of AtOM (at the time called `parcellation.ttl`) was developed by eliciting  
329 requirements and use cases from the Blue Brain Project ([https://github.com/SciCrunch/NIF-](https://github.com/SciCrunch/NIF-Ontology/issues/49)  
330 `Ontology/issues/49`). In order to ingest atlas terminologies into the NIF standard ontology a  
331 python module  
332 ([https://github.com/tgbugs/pyontutils/tree/master/nifstd/nifstd\\_tools/parcellation](https://github.com/tgbugs/pyontutils/tree/master/nifstd/nifstd_tools/parcellation)) was written  
333 to convert from a variety of formats into OWL. An initial version of the core ontology and 24  
334 atlas terminologies were created. These ontologies were loaded into SciGraph  
335 (<https://github.com/SciGraph/SciGraph>) and queries ([https://github.com/SciCrunch/sparc-](https://github.com/SciCrunch/sparc-curation/blob/67b534a939e2a271050c6edad97c707d8ec075d3/resources/scigraph/cypher-resources.yaml#L51-L267)  
336 `curation/blob/67b534a939e2a271050c6edad97c707d8ec075d3/resources/scigraph/cypher-`  
337 `resources.yaml#L51-L267`) were then written against the original data model using the  
338 Cypher query language in order to find atlases, terminologies, and individual terms for  
339 specific atlases, species, and developmental stages. These queries have been used in  
340 production systems for over 4 years. During this time additional atlases were ingested using  
341 the python module (now totaling 40) and an initial draft of the conceptual model for AtOM  
342 was developed ([https://github.com/SciCrunch/NIF-Ontology/blob/master/docs/brain-](https://github.com/SciCrunch/NIF-Ontology/blob/master/docs/brain-regions.org)  
343 `regions.org`). For a full record of the iterative development of the model to fully distinguish  
344 the major elements found in the current version (though not under their current names) see  
345 <https://github.com/SciCrunch/NIF-Ontology/issues/49>.

346         A second round of development involved further requirements collection in the  
347 context of atlas creation and the conceptual model was heavily revised, regularized, and  
348 extended in the context of the atlas needs of the Human Brain Project (HBP)  
349 ([https://github.com/SciCrunch/NIF-](https://github.com/SciCrunch/NIF-Ontology/commits/64c32abed9963073fab90dd5901d806fd8503da2)  
350 `Ontology/commits/64c32abed9963073fab90dd5901d806fd8503da2` commit history from  
351 work during the HBP meeting in Oslo in November 21-22 2019) and the Allen Institute for  
352 Brain Sciences ([https://github.com/SciCrunch/NIF-](https://github.com/SciCrunch/NIF-Ontology/commit/a40a8c786529f5b2e2a3a8007776d057c5830d2d)  
353 `Ontology/commit/a40a8c786529f5b2e2a3a8007776d057c5830d2d`, other interactions

354 occurred, but do not have public records of their occurrence). Various iterations of the model  
355 were applied to a wide variety of atlases and atlas-like things, such as paper and digital  
356 atlases, ontologies, figures from publications, crudely drawn diagrams on table cloths, globes,  
357 geographic information systems, traditional cartographic maps, topological maps of the  
358 peripheral nervous system, and more. This was followed by collection of requirements and  
359 live ontology development carried out in the context of the HBP, which included alignment  
360 with the schemas of the openMINDS SANDS metadata model for reporting spatial metadata  
361 ([https://github.com/HumanBrainProject/openMINDS\\_SANDS](https://github.com/HumanBrainProject/openMINDS_SANDS)). The resulting ontological  
362 model was applied to a number of existing atlases, specifically the WHS rat brain atlas<sup>14,36,37</sup>,  
363 the AMBA CCF v3<sup>11,13</sup>, and the human Julich-Brain atlas<sup>16,56</sup>.  
364

## 365 **Data availability**

366 NA

## 367 **Code availability**

368 NA

## 369 **Acknowledgements**

370 The present work builds on our earlier contributions to development of brain atlases,  
371 neuroinformatics and ontologies in neuroscience with contributions from many researchers.  
372 The inspiration for developing the Atlas Ontology Model came through fruitful and valuable  
373 discussions at the INCF Workshop on Digital Brain Atlasing in Warsaw, 2019. We  
374 particularly thank Michael Hawrylycz, Alexander Woodward, Rembrandt Bakker, Ingvild E.  
375 Bjerke, Martin Øvsthus, Ulrike Schlegel, Stefan Köhnen, Xiao Gui, and Camilla Blixhavn for  
376 valuable discussions during the different stages of developing the Atlas Ontology Model.  
377 This work was funded by the European Union's Horizon 2020 Framework Programme for  
378 Research and Innovation under the Specific Grant Agreement No. 785907 (Human Brain  
379 Project SGA2) and Specific Grant Agreement No. 945539 (Human Brain Project SGA3), The  
380 Research Council of Norway under Grant Agreement No. 269774 (INCF Norwegian Node, to  
381 JGB and TBL), and the Helmholtz Association's Initiative and Networking Fund through the

382 Helmholtz International BigBrain Analytics and Learning Laboratory (HIBALL) under the  
383 Helmholtz International Lab grant agreement InterLabs-0015 (to TD).

384

## 385 **Author contributions**

386 **HK** contributed to conceiving the study, establishing and validating the model, writing the  
387 paper, and creating figures. **THG** contributed to conceiving the study, establishing and  
388 validating the model, creating and maintaining the ontology, writing the paper, and creating  
389 figures. **LZ** contributed to establishing and validating the model, and writing the paper. **TD**  
390 contributed to establishing and validating the model, and writing the paper. **JGB** contributed  
391 to establishing and validating the model, and writing the paper. **MEM** contributed to  
392 conceiving the study, establishing and validating the model, writing the paper, and  
393 supervising the study. **TBL** contributed to conceiving the study, establishing and validating  
394 the model, writing the paper, and supervising the study.

395

## 396 **Competing interests**

397 **MM** is the founder and has equity interest in SciCrunch Inc, a tech start up out of UCSD that  
398 provides tools and services in support of reproducible science and Research Resource  
399 Identifiers. **JGB** is a member of the Management Board of the EBRAINS AISBL, Brussels,  
400 Belgium. The other authors declare that no competing interests or conflicts of interest exist  
401 for any of the authors.

402

## 403 **References**

- 404 1. Bjaalie, J. Localization in the brain: new solutions emerging. *Nat. Rev. Neurosci.* **3**,  
405 322–325 (2002).
- 406 2. Sunkin, S. & Hohmann, J. Insights from spatially mapped gene expression in the  
407 mouse brain. *Hum. Mol. Genet.* **16**, R209–R219 (2007).
- 408 3. Nowinski, W. Evolution of Human Brain Atlases in Terms of Content, Applications,  
409 Functionality, and Availability. *Neuroinformatics* **19**, 1–22 (2021).
- 410 4. Osumi-Sutherland, D. *et al.* Cell type ontologies of the Human Cell Atlas. *Nat. Cell*

- 411 *Biol.* **23**, 1129–1135 (2021).
- 412 5. Tyson, A. & Margrie, T. Mesoscale microscopy and image analysis tools for  
413 understanding the brain. *Prog. Biophys. Mol. Biol.* **168**, 81–93 (2022).
- 414 6. Newmaster, K., Kronman, F., Wu, Y. & Kim, Y. Seeing the Forest and Its Trees  
415 Together: Implementing 3D Light Microscopy Pipelines for Cell Type Mapping in the  
416 Mouse Brain. *Front. Neuroanat.* **15**, 1–19 (2022).
- 417 7. Amunts, K. *et al.* Interoperable atlases of the human brain. *Neuroimage* **99**, 525–532  
418 (2014).
- 419 8. Bjerke, I. *et al.* Data integration through brain atlasing: Human Brain Project tools and  
420 strategies. *Eur. Psychiatry* **50**, 70–76 (2018).
- 421 9. Bjerke, I. *et al.* Navigating the Murine Brain: Toward Best Practices for Determining  
422 and Documenting Neuroanatomical Locations in Experimental Studies. *Front.*  
423 *Neuroanat.* **12**, 1–15 (2018).
- 424 10. Feo, R. & Giove, F. Towards an efficient segmentation of small rodents brain: A short  
425 critical review. *J. Neurosci. Methods* **323**, 82–89 (2019).
- 426 11. Wang, Q. *et al.* The Allen Mouse Brain Common Coordinate Framework: A 3D  
427 Reference Atlas. *Cell* **181**, 1–18 (2020).
- 428 12. Börner, K. *et al.* Anatomical structures, cell types and biomarkers of the Human  
429 Reference Atlas. *Nat. Cell Biol.* **23**, 1117–1128 (2021).
- 430 13. Oh, S. *et al.* A mesoscale connectome of the mouse brain. *Nature* **508**, 207–214  
431 (2014).
- 432 14. Papp, E., Leergaard, T., Calabrese, E., Johnson, G. & Bjaalie, J. Waxholm Space atlas  
433 of the Sprague Dawley rat brain. *Neuroimage* **97**, 374–386 (2014).
- 434 15. Woodward, A. *et al.* The Brain/MINDS 3D digital marmoset brain atlas. *Sci. Data* **5**,  
435 180009 (2018).
- 436 16. Amunts, K., Mohlberg, H., Bludau, S. & Zilles, K. Julich-Brain: A 3D probabilistic  
437 atlas of the human brain’s cytoarchitecture. *Science* **369**, 988–992 (2020).
- 438 17. Wagstyl, K. *et al.* BigBrain 3D atlas of cortical layers: Cortical and laminar thickness  
439 gradients diverge in sensory and motor cortices. *PLOS Biol.* **18**, e3000678 (2020).
- 440 18. Vandenberghe, M. *et al.* High-throughput 3D whole-brain quantitative histopathology  
441 in rodents. *Sci. Rep.* **6**, 20958 (2016).
- 442 19. Fürth, D. *et al.* An interactive framework for whole-brain maps at cellular resolution.  
443 *Nat. Neurosci.* **21**, 139–149 (2018).
- 444 20. Puchades, M., Csucs, G., Ledergerber, D., Leergaard, T. & Bjaalie, J. Spatial

- 445 registration of serial microscopic brain images to three-dimensional reference atlases  
446 with the QuickNII tool. *PLoS One* **14**, e0216796 (2019).
- 447 21. Yates, S. *et al.* QUINT: Workflow for Quantification and Spatial Analysis of Features  
448 in Histological Images From Rodent Brain. *Front. Neuroinform.* **13**, 1–14 (2019).
- 449 22. Groeneboom, N., Yates, S., Puchades, M. & Bjaalie, J. Nutil: A Pre- and Post-  
450 processing Toolbox for Histological Rodent Brain Section Images. *Front.*  
451 *Neuroinform.* **14**, 37 (2020).
- 452 23. Pallast, N., Wieters, F., Fink, G. & Aswendt, M. Atlas-based imaging data analysis  
453 tool for quantitative mouse brain histology (AIDAhisto). *J. Neurosci. Methods* **326**,  
454 108394 (2019).
- 455 24. Bjerke, I. *et al.* Densities and numbers of calbindin and parvalbumin positive neurons  
456 across the rat and mouse brain. *iScience* **24**, 1–20 (2021).
- 457 25. Newmaster, K. *et al.* Quantitative cellular-resolution map of the oxytocin receptor in  
458 postnatally developing mouse brains. *Nat. Commun.* **11**, 1–12 (2020).
- 459 26. Attili, S., Silva, M., Nguyen, T. & Ascoli, G. Cell numbers, distribution, shape, and  
460 regional variation throughout the murine hippocampal formation from the adult brain  
461 Allen Reference Atlas. *Brain Struct. Funct.* **224**, 2883–2897 (2019).
- 462 27. Wilkinson, M. *et al.* The FAIR Guiding Principles for scientific data management and  
463 stewardship. *Sci. Data* **3**, 160018 (2016).
- 464 28. Amunts, K. & Zilles, K. Architectonic Mapping of the Human Brain beyond  
465 Brodmann. *Neuron* **88**, 1086–1107 (2015).
- 466 29. Papp, E., Leergaard, T., Calabrese, E., Johnson, G. & Bjaalie, J. Addendum to  
467 “Waxholm Space atlas of the Sprague Dawley rat brain” [NeuroImage 97 (2014) 374-  
468 386]. *Neuroimage* **105**, 561–562 (2015).
- 469 30. Lein, E. *et al.* Genome-wide atlas of gene expression in the adult mouse brain. *Nature*  
470 **445**, 168–176 (2007).
- 471 31. Amunts, K. *et al.* BigBrain: An Ultrahigh-Resolution 3D Human Brain Model. *Science*  
472 **340**, 1472–1475 (2013).
- 473 32. Paxinos, G. & Watson, C. *The rat brain in stereotaxic coordinates*. (Academic Press,  
474 1982).
- 475 33. Swanson, L. *Brain Maps: Structure of the rat brain*. (Elsevier, 1992).
- 476 34. Paxinos, G., Watson, C., Calabrese, E., Badea, A. & Johnson, G. *MRI/DTI Atlas of the*  
477 *Rat Brain*. (Academic Press, 2015).
- 478 35. Swanson, L. Brain maps 4.0-Structure of the rat brain : An open access atlas with



- 479 global nervous system nomenclature ontology and flatmaps. *J. Comp. Neurol.* **526**,  
480 935–943 (2018).
- 481 36. Kjonigsen, L., Lillehaug, S., Bjaalie, J., Witter, M. & Leergaard, T. Waxholm Space  
482 atlas of the rat brain hippocampal region: Three-dimensional delineations based on  
483 magnetic resonance and diffusion tensor imaging. *Neuroimage* **108**, 441–449 (2015).
- 484 37. Osen, K., Imad, J., Wennberg, A., Papp, E. & Leergaard, T. Waxholm Space atlas of  
485 the rat brain auditory system: Three-dimensional delineations based on structural and  
486 diffusion tensor magnetic resonance imaging. *Neuroimage* **199**, 38–56 (2019).
- 487 38. Paxinos, G. & Watson, C. *The Rat Brain in Stereotaxic Coordinates*. (Academic Press,  
488 2018).
- 489 39. Fonov, V. *et al.* Unbiased average age-appropriate atlases for pediatric studies.  
490 *Neuroimage* **54**, 313–327 (2011).
- 491 40. Evans, A., Janke, A., Collins, D. & Baillet, S. Brain templates and atlases. *Neuroimage*  
492 **62**, 911–922 (2012).
- 493 41. Dale, A., Fischl, B. & Sereno, M. Cortical Surface-Based Analysis. *Neuroimage* **9**,  
494 179–194 (1999).
- 495 42. Johnson, G. *et al.* Waxholm Space: An image-based reference for coordinating mouse  
496 brain research. *Neuroimage* **53**, 365–372 (2010).
- 497 43. Dadi, K. *et al.* Fine-grain atlases of functional modes for fMRI analysis. *Neuroimage*  
498 **221**, 117126 (2020).
- 499 44. López-López, N. *et al.* From Coarse to Fine-Grained Parcellation of the Cortical  
500 Surface Using a Fiber-Bundle Atlas. *Front. Neuroinform.* **14**, 1–22 (2020).
- 501 45. Fan, L. *et al.* The Human Brainnetome Atlas: A New Brain Atlas Based on  
502 Connectional Architecture. *Cereb. Cortex* **26**, 3508–3526 (2016).
- 503 46. Valverde, F. *Golgi atlas of the postnatal mouse brain*. (Springer, 1998).
- 504 47. Altman, J. & Bayer, S. *Atlas of prenatal rat brain development*. (CRC Press, 1995).
- 505 48. Glasser, M. *et al.* A multi-modal parcellation of human cerebral cortex. *Nature* **536**,  
506 171–178 (2016).
- 507 49. Boccara, C. *et al.* A three-plane architectonic atlas of the rat hippocampal region.  
508 *Hippocampus* **00**, 1–20 (2015).
- 509 50. Olsen, G. & Witter, M. Posterior parietal cortex of the rat: Architectural delineation  
510 and thalamic differentiation. *J. Comp. Neurol.* **524**, 3774–3809 (2016).
- 511 51. Allen Institute for Brain Science. Technical white paper: Allen mouse common  
512 coordinate framework. <http://help.brain-map.org/display/mousebrain/Documentation>

- 513 (2015).
- 514 52. Allen Institute for Brain Science. Technical white paper: Allen mouse common  
515 coordinate framework. (2016).
- 516 53. Allen Institute for Brain Science. Technical white paper: Allen mouse common  
517 coordinate framework and reference atlas. [http://help.brain-](http://help.brain-map.org/display/mouseconnectivity/Documentation)  
518 [map.org/display/mouseconnectivity/Documentation](http://help.brain-map.org/display/mouseconnectivity/Documentation) (2017).
- 519 54. Amunts, K. *et al.* *Julich-Brain Atlas - whole-brain collections of cytoarchitectonic*  
520 *probabilistic maps (v2.9)*. EBRAINS <https://doi.org/10.25493/46HK-XMM> (2021).
- 521 55. Amunts, K. *et al.* *Whole-brain parcellation of the Julich-Brain Cytoarchitectonic Atlas*  
522 *(v2.9)*. EBRAINS <https://doi.org/10.25493/VSMK-H94> (2021).
- 523 56. Mangin, J., Rivière, D. & Amunts, K. *Surface projections of Julich-Brain*  
524 *cytoarchitectonic maps (v2.9)*. EBRAINS <https://doi.org/10.25493/NZGY-6AS> (2021).
- 525 57. Bandrowski, A. *et al.* The Resource Identification Initiative: a cultural shift in  
526 publishing. *Brain Behav.* **6**, e00417 (2016).
- 527 58. Allen Institute for Brain Science. Technical white paper: Allen reference atlas -  
528 version 2 (2011). <http://help.brain-map.org/display/mousebrain/Documentation> (2011).
- 529 59. Allen Institute for Brain Science. Technical white paper: Allen reference atlas -  
530 version 1 (2008). <http://help.brain-map.org/display/mousebrain/Documentation> (2008)  
531 [doi:10.1354/vp.45-5-724-a](https://doi.org/10.1354/vp.45-5-724-a).
- 532 60. Bota, M. & Swanson, L. 1st INCF Workshop on Neuroanatomical Nomenclature and  
533 Taxonomy. *Nat. Preced.* 12–17 (2008) [doi:10.1038/npre.2008.1780.1](https://doi.org/10.1038/npre.2008.1780.1).
- 534 61. Hawrylycz, M. *et al.* The INCF Digital Atlasing Program: Report on Digital Atlasing  
535 Standards in the Rodent Brain. *Nat. Preced.* (2009) [doi:10.1038/npre.2009.4000](https://doi.org/10.1038/npre.2009.4000).
- 536 62. Bohland, J., Bokil, H., Allen, C. & Mitra, P. The Brain Atlas Concordance Problem:  
537 Quantitative Comparison of Anatomical Parcellations. *PLoS One* **4**, e7200 (2009).
- 538 63. Azimi, N., Yadollahikhales, G., Argenti, J. & Cunningham, M. Discrepancies in  
539 stereotaxic coordinate publications and improving precision using an animal-specific  
540 atlas. *J. Neurosci. Methods* **284**, 15–20 (2017).
- 541 64. Khan, A., Perez, J., Wells, C. & Fuentes, O. Computer Vision Evidence Supporting  
542 Craniometric Alignment of Rat Brain Atlases to Streamline Expert-Guided, First-  
543 Order Migration of Hypothalamic Spatial Datasets Related to Behavioral Control.  
544 *Front. Syst. Neurosci.* **12**, 1–29 (2018).
- 545 65. Van De Werd, H. & Uylings, H. Comparison of (stereotactic) parcellations in mouse  
546 prefrontal cortex. *Brain Struct. Funct.* **219**, 433–459 (2014).

- 547 66. Laubach, M., Amarante, L., Swanson, K. & White, S. What, If Anything, Is Rodent  
548 Prefrontal Cortex? *eneuro* **5**, ENEURO.0315-18.2018 (2018).
- 549 67. Mai, J. & Majtanik, M. Toward a Common Terminology for the Thalamus. *Front.*  
550 *Neuroanat.* **12**, 1–23 (2019).
- 551 68. Bjerke, I., Yates, S., Puchades, M., Bjaalie, J. & Leergaard, T. *Brain-wide quantitative*  
552 *data on parvalbumin positive neurons in the rat*. EBRAINS  
553 <https://doi.org/10.25493/KR92-C33> (2020).
- 554 69. Guarino, N. Formal ontology, conceptual analysis and knowledge representation. *Int.*  
555 *J. Hum. Comput. Stud.* **43**, 625–640 (1995).
- 556 70. Chandrasekaran, B., Josephson, J. & Benjamins, V. What are ontologies, and why do  
557 we need them? *IEEE Intell. Syst.* **14**, 20–26 (1999).
- 558 71. Mikula, S., Trotts, I., Stone, J. & Jones, E. Internet-enabled high-resolution brain  
559 mapping and virtual microscopy. *Neuroimage* **35**, 9–15 (2007).
- 560 72. Amunts, K., Eickhoff, S., Caspers, S., Bludau, S. & Mohlberg, H. *Whole-brain*  
561 *parcellation of the Julich-Brain Cytoarchitectonic Atlas (v1.18)*. Human Brain Project  
562 Neuroinformatics Platform <https://doi.org/10.25493/8EGG-ZAR> (2019).  
563

564 **Figures**

565 **Figure 1. AtOM: Brain atlas elements, relations and metadata**

566

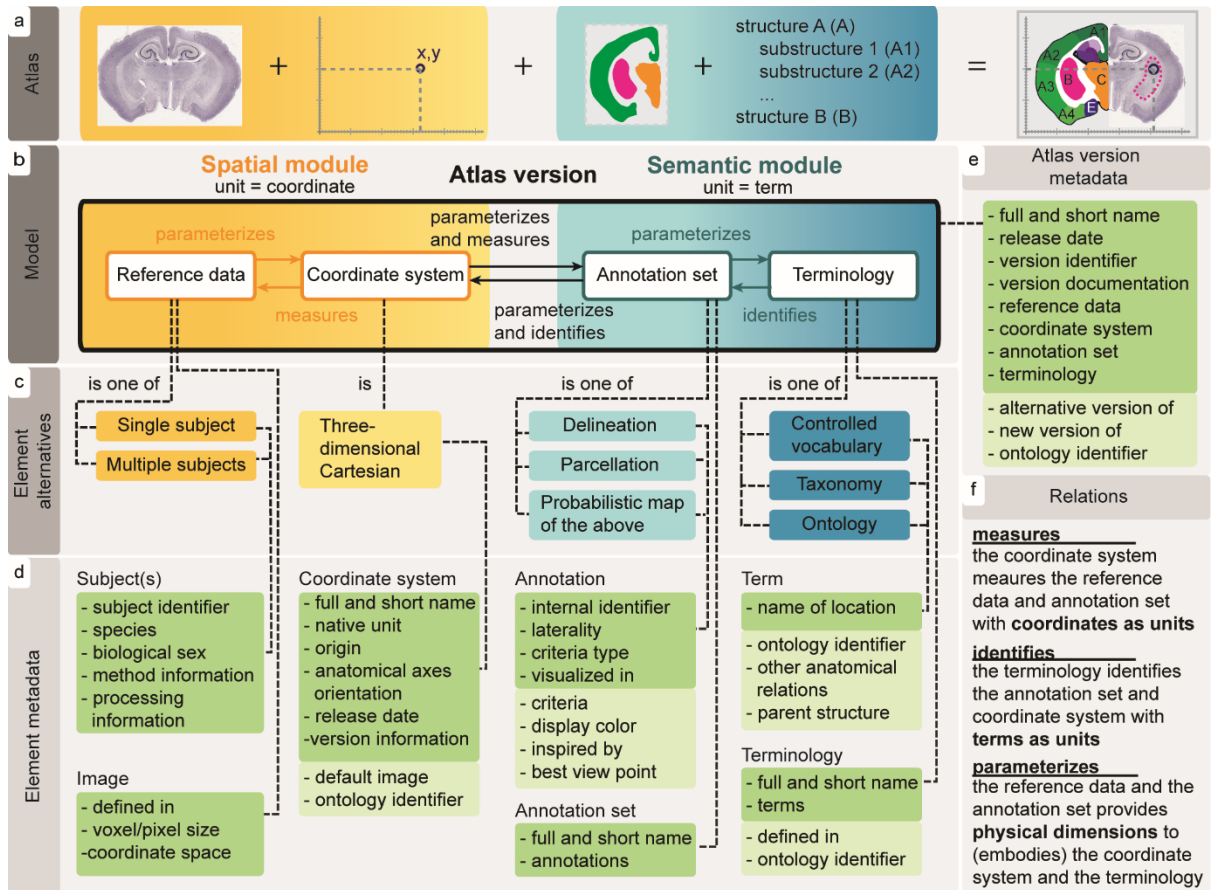

567

568

569 (a) A diagram showing a fictional atlas divided into parts. Nissl stained coronal Platypus  
 570 (*ornithorhynchus anatinus*) brain section<sup>71</sup>. (b) The Atlas Ontology Model (AtOM) showing  
 571 the elements: *reference data*, *coordinate system*, *annotation set*, and *terminology*, and their  
 572 relations (as seen in (f)). The model consists of two reference modules: *spatial* (containing  
 573 the coordinate system and reference data, yellow) and *semantic* (containing annotations and  
 574 terminology, blue). (c) Each element can be one of a set of alternatives, (d) which have a set  
 575 of minimum (dark green) and additional metadata (bright green). (e) The aggregated atlas  
 576 version metadata, and (f) specification of model relations; *measures* (to provide a metric to),  
 577 *identifies* (to recognize, establish or verify the identity of something) and *parameterizes* (to  
 578 set the conditions of its operation).

579

580

581 **Figure 2. AtOM representation of the most recent EBRAINS supported mouse, rat, and**  
 582 **human brain atlas versions**

583

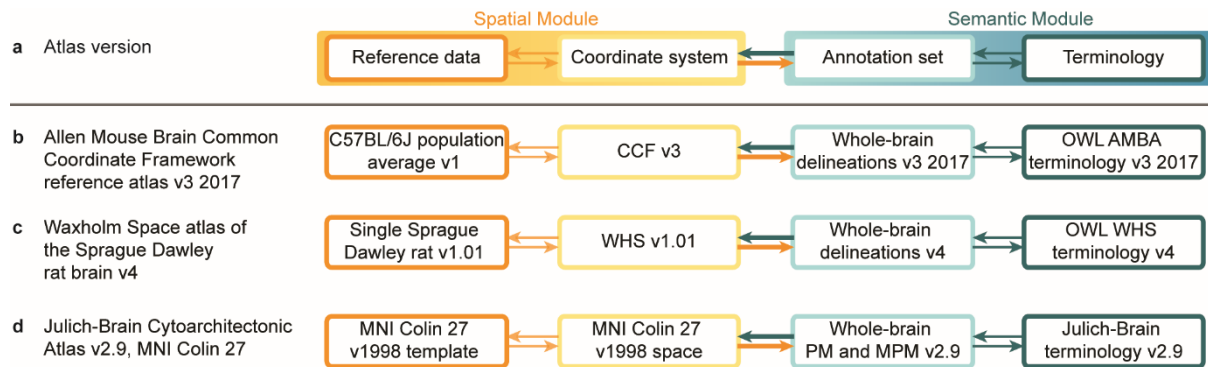

584

585

586 **(a)** Diagram showing AtOM. **(b-d)** Tabular view of the most recent versions of **(b)** the Allen  
 587 Mouse Brain Atlas Common Coordinate Framework<sup>11</sup>, **(c)** the Waxholm Space atlas of the  
 588 Sprague Dawley rat brain<sup>14</sup> and, **(d)** one alternative representation of the Julich-Brain  
 589 cytoarchitectonic atlas<sup>16</sup>, which are all accessible in the EBRAINS infrastructure  
 590 (<https://ebrains.hbp.eu/services/atlas>). A more detailed representation of these atlas  
 591 versions can be found in Table 1. Table 2 show all version of the mouse and rat atlases, as  
 592 well as all the alternative representation of the human brain atlas v1.18 and v2.9. CCF,  
 593 Common Coordinate Framework; OWL, Web Ontology Language; AMBA, Allen Mouse  
 594 Brain Atlas; WHS, Waxholm Space; MNI, Montreal Neurological Institute; PM, probabilistic  
 595 maps; MPM, maximum probability maps.

596

## 597 Tables

598 **Table 1. Mouse, rat and human brain atlas version metadata**

|                        |                                                                                                                                                                                                                |                                                                                                                                               |                                                                                       |
|------------------------|----------------------------------------------------------------------------------------------------------------------------------------------------------------------------------------------------------------|-----------------------------------------------------------------------------------------------------------------------------------------------|---------------------------------------------------------------------------------------|
| Full name              | Allen Mouse Brain Atlas Common Coordinate Framework v3 2017                                                                                                                                                    | Waxholm Space atlas of the Sprague Dawley rat brain v4                                                                                        | Julich-Brain Cytoarchitectonic Atlas v2.9, MNI Colin 27                               |
| Short name             | AMBA CCF v3 2017                                                                                                                                                                                               | WHS rat brain atlas v4; WHSSDv4                                                                                                               | Julich-Brain v2.9, Colin 27                                                           |
| Version identifier     | 3, 2017                                                                                                                                                                                                        | 4                                                                                                                                             | 2.9, Colin 27                                                                         |
| Version innovation     | Publication <sup>11</sup> ; White paper AMBA CCF v3 2017 ( <a href="http://help.brain-map.org/display/mouseconnectivity/Documentation">http://help.brain-map.org/display/mouseconnectivity/Documentation</a> ) | Publication <sup>14</sup> ; Webpage ( <a href="https://www.nitrc.org/projects/whs-sd-atlas">https://www.nitrc.org/projects/whs-sd-atlas</a> ) | Publication <sup>16</sup> ; EBRAINS datasets <sup>54,55</sup>                         |
| Alternative version of | NA                                                                                                                                                                                                             | NA                                                                                                                                            | Julich-Brain v2.9, MNI 152; Julich-Brain v2.9, BigBrain; Julich-Brain v2.9, fsaverage |
| New version of         | AMBA CCF v3 2016                                                                                                                                                                                               | WHS rat brain atlas v3.01                                                                                                                     | Julich-Brain v2.5, Colin 27                                                           |
| Release date           | NA                                                                                                                                                                                                             | 01.10.2021                                                                                                                                    | 31.07.2021                                                                            |
| Reference data         | C57BL/6J population average v1                                                                                                                                                                                 | Sprague Dawley rat v1.01                                                                                                                      | MNI Colin27 v1998 template                                                            |
| Coordinate system      | CCF v3                                                                                                                                                                                                         | WHS v1.01                                                                                                                                     | MNI Colin27 v1998 space                                                               |
| Annotation set         | Whole-brain parcellation, v3 2017                                                                                                                                                                              | Whole-brain parcellation, v4                                                                                                                  | Whole-brain probabilistic maps and maximum probability maps                           |
| Terminology            | OWL AMBA CCF terminology, v3 2017                                                                                                                                                                              | OWL WHS SD terminology, v4                                                                                                                    | Julich-Brain terminology, v2.9                                                        |
| License                | Not available, but see legal note ( <a href="https://alleninstitute.org/legal/citation-policy/">https://alleninstitute.org/legal/citation-policy/</a> )                                                        | Creative Commons Attribution ShareAlike (CC BY-SA) 4.0                                                                                        | Creative Commons Attribution-NonCommercial-ShareAlike (CC BY-NC-SA) 4.0               |

599 AMBA, Allen Mouse Brain Atlas; CCF, Common Coordinate Framework; MNI, Montreal

600 Neurological Institute; OWL, Web Ontology Language; SD, Sprague Dawley; WHS,

601 Waxholm Space.

602

603 **Table 2. EBRAINS supported mouse, rat and human brain atlas versions**

| Species | Version number | Atlas version name (semantic ID)                                      | Reference data                            | Coordinate system                      | Annotation set                   | Terminology                                                                                                                             | Reference(s)                                                                                                                                                      |                  |
|---------|----------------|-----------------------------------------------------------------------|-------------------------------------------|----------------------------------------|----------------------------------|-----------------------------------------------------------------------------------------------------------------------------------------|-------------------------------------------------------------------------------------------------------------------------------------------------------------------|------------------|
| Mouse   | 1              | Allen Mouse Brain Common Coordinate Framework reference atlas v1      | C57BL/6J population average v1            | CCF v1                                 | Whole-brain delineations v1      | OWL AMBA terminology v1                                                                                                                 | <a href="http://help.brain-map.org/display/mousebrain/Documentation">http://help.brain-map.org/display/mousebrain/Documentation</a> ; <sup>30</sup>               |                  |
|         | 2              | Allen Mouse Brain Common Coordinate Framework reference atlas v2      |                                           | CCF v2                                 | Whole-brain delineations v2      | OWL AMBA terminology v2                                                                                                                 | <a href="http://help.brain-map.org/display/mousebrain/Documentation">http://help.brain-map.org/display/mousebrain/Documentation</a> ; <sup>13</sup>               |                  |
|         | 3              | Allen Mouse Brain Common Coordinate Framework reference atlas v3 2015 |                                           | CCF v3                                 | Whole-brain delineations v3 2015 | OWL AMBA terminology v3 2015                                                                                                            | <a href="http://help.brain-map.org/display/mousebrain/Documentation">http://help.brain-map.org/display/mousebrain/Documentation</a> ; <sup>11</sup>               |                  |
|         |                | Allen Mouse Brain Common Coordinate Framework reference atlas v3 2016 |                                           |                                        | Whole-brain delineations v3 2016 | OWL AMBA terminology v3 2016                                                                                                            | <sup>11</sup>                                                                                                                                                     |                  |
|         |                | Allen Mouse Brain Common Coordinate Framework reference atlas v3 2017 |                                           |                                        | Whole-brain delineations v3 2017 | OWL AMBA terminology v3 2017                                                                                                            | <a href="http://help.brain-map.org/display/mouseconnectivity/Documentation">http://help.brain-map.org/display/mouseconnectivity/Documentation</a> ; <sup>11</sup> |                  |
| Rat     | 1              | Waxholm Space atlas of the Sprague Dawley rat brain v1                | Single Sprague Dawley rat v1              | WHS v1                                 | Whole-brain delineations v1      | OWL WHS terminology v1                                                                                                                  | RRID: SCR_017124; <a href="https://www.nitrc.org/projects/whs-sd-atlas">https://www.nitrc.org/projects/whs-sd-atlas</a> ; <sup>14</sup>                           |                  |
|         | 1.01           | Waxholm Space atlas of the Sprague Dawley rat brain v1.01             |                                           | WHS v1.01                              | Whole-brain delineations v1.01   | OWL WHS terminology v1.01                                                                                                               | RRID: SCR_017124; <a href="https://www.nitrc.org/projects/whs-sd-atlas">https://www.nitrc.org/projects/whs-sd-atlas</a> ; <sup>29</sup>                           |                  |
|         | 2              | Waxholm Space atlas of the Sprague Dawley rat brain v2                |                                           | Whole-brain delineations v2            | OWL WHS terminology v2           | RRID: SCR_017124; <a href="https://www.nitrc.org/projects/whs-sd-atlas">https://www.nitrc.org/projects/whs-sd-atlas</a> ; <sup>36</sup> |                                                                                                                                                                   |                  |
|         | 3              | Waxholm Space atlas of the Sprague Dawley rat brain v3                |                                           | Whole-brain delineations v3            | OWL WHS terminology v3           | RRID: SCR_017124; <a href="https://www.nitrc.org/projects/whs-sd-atlas">https://www.nitrc.org/projects/whs-sd-atlas</a> ; <sup>37</sup> |                                                                                                                                                                   |                  |
|         | 3.01           | Waxholm Space atlas of the Sprague Dawley rat brain v3.01             |                                           | Whole-brain delineations v3.01         | OWL WHS terminology v3.01        | NA                                                                                                                                      |                                                                                                                                                                   |                  |
|         | 4              | Waxholm Space atlas of the Sprague Dawley rat brain v4                |                                           | Whole-brain delineations v4            | OWL WHS terminology v4           | RRID: SCR_017124; <a href="https://www.nitrc.org/projects/whs-sd-atlas">https://www.nitrc.org/projects/whs-sd-atlas</a> ; <sup>14</sup> |                                                                                                                                                                   |                  |
| Human*  | 1.18           | Julich-Brain Cytoarchitectonic Atlas v1.18, MNI Colin 27              | MNI Colin 27 v1998 template               | MNI Colin 27 v1998 space               | Whole-brain PM and MPM v1.18     | Julich-Brain terminology v1.18                                                                                                          | <sup>72</sup>                                                                                                                                                     |                  |
|         |                | Julich-Brain Cytoarchitectonic Atlas v1.18, MNI 152                   | MNI ICBM 152 (2009c nonlin asym) template | MNI ICBM 152 (2009c nonlin asym) space |                                  |                                                                                                                                         | <sup>72</sup>                                                                                                                                                     |                  |
|         |                | Julich-Brain Cytoarchitectonic Atlas v1.18, BigBrain                  | BigBrain (v2015) template                 | BigBrain (v2015) space                 |                                  |                                                                                                                                         | High-resolution maps v1.18                                                                                                                                        | <sup>31</sup>    |
|         | 2.9            | Julich-Brain Cytoarchitectonic Atlas v2.9, MNI Colin 27               | MNI Colin 27 v1998 template               | MNI Colin 27 v1998 space               | Whole-brain PM and MPM v2.9      | Julich-Brain terminology v2.9                                                                                                           | <sup>16,54,55</sup>                                                                                                                                               |                  |
|         |                | Julich-Brain Cytoarchitectonic Atlas v2.9, MNI 152                    | MNI ICBM 152 (2009c nonlin asym) template | MNI ICBM 152 (2009c nonlin asym) space |                                  |                                                                                                                                         | <sup>16,54,55</sup>                                                                                                                                               |                  |
|         |                | Julich-Brain Cytoarchitectonic Atlas v2.9, BigBrain                   | BigBrain (v2015) template                 | BigBrain (v2015) space                 |                                  |                                                                                                                                         | High-resolution maps v2.9                                                                                                                                         | <sup>17,31</sup> |
|         |                | Julich-Brain Cytoarchitectonic Atlas v2.9, fsaverage                  | fsaverage surface v1                      | fsaverage space v1                     |                                  |                                                                                                                                         | Surface projections v2.9                                                                                                                                          | <sup>16,56</sup> |

604 \*Only two major releases, each with their alternative versions (representations of the  
605 annotation set in different coordinate systems and respective reference data) of the human  
606 brain atlas are shown here.
